# Supplementary material for: Separation of α-Lactalbumin-Enriched Fractions from Caprine and Ovine Native Whey Concentrate by Combining Membrane and High-Pressure Processing
Source: MDPI journal article supplement (doi:10.3390/foods12142688), 2023-07-12
Supplement: s1 [file s1]

**Table S1.** Protein concentrations and main process performance parameters of  $\alpha$ -Lactalbumin ( $\alpha$ -La) enriched fraction after high-pressure processing (HPP) of ovine native whey concentrate (NWC) at 600 MPa at 23°C (supernatant). Each value is expressed as mean value  $\pm$  SD (n = 3). Different small letters in the same column indicate significant (P < 0.05) differences according to Tukey test. \*Significant differences regarding the control (untreated) NWC (T-Test).

| pH   | HPP processing (min)  | a-La concentration (mg/mL)     | b-Lg B concentration (mg/mL)  | b-Lg A concentration (mg/mL)  | b-Lg A + B concentration (mg/mL) | Y <sub>a-La</sub> (%)           | Pur <sub>a-La</sub> (%)        | Preb-Lg B (%)                   | Preb-Lg A (%)                  | Preb-Lg A + B (%)               |
|------|-----------------------|--------------------------------|-------------------------------|-------------------------------|----------------------------------|---------------------------------|--------------------------------|---------------------------------|--------------------------------|---------------------------------|
| P-pH | Control (untreated)   | 32.35 $\pm$ 1.65 <sup>cd</sup> | 51.89 $\pm$ 2.19 <sup>b</sup> | 54.56 $\pm$ 2.19 <sup>a</sup> | 106.46 $\pm$ 4.37 <sup>b</sup>   | -                               | 23.30 $\pm$ 0.19 <sup>e</sup>  | -                               | -                              | -                               |
|      | 2                     | 34.04 $\pm$ 0.54 <sup>bc</sup> | 3.37 $\pm$ 0.46 <sup>d</sup>  | 2.97 $\pm$ 0.51 <sup>d</sup>  | 6.33 $\pm$ 0.97 <sup>de</sup>    | 62.01 $\pm$ 2.17 <sup>b*</sup>  | 84.35 $\pm$ 1.83 <sup>b</sup>  | 96.21 $\pm$ 0.58 <sup>a*</sup>  | 96.83 $\pm$ 0.61 <sup>a*</sup> | 96.53 $\pm$ 0.60 <sup>ab*</sup> |
|      | 4                     | 29.09 $\pm$ 2.23 <sup>d</sup>  | 2.34 $\pm$ 0.10 <sup>d</sup>  | 1.78 $\pm$ 0.16 <sup>d</sup>  | 4.12 $\pm$ 0.13 <sup>e</sup>     | 44.83 $\pm$ 4.60 <sup>c*</sup>  | 87.56 $\pm$ 0.95 <sup>ab</sup> | 97.78 $\pm$ 0.15 <sup>a*</sup>  | 98.40 $\pm$ 0.14 <sup>a*</sup> | 98.10 $\pm$ 0.10 <sup>a*</sup>  |
|      | 15                    | 15.29 $\pm$ 0.08 <sup>e</sup>  | 0.52 $\pm$ 0.03 <sup>d</sup>  | 0.55 $\pm$ 0.01 <sup>d</sup>  | 1.03 $\pm$ 0.05 <sup>e</sup>     | 20.71 $\pm$ 1.66 <sup>d*</sup>  | 93.68 $\pm$ 0.26 <sup>a</sup>  | 99.58 $\pm$ 0.05 <sup>a*</sup>  | 99.59 $\pm$ 0.05 <sup>a*</sup> | 90.58 $\pm$ 0.05 <sup>a*</sup>  |
| 4.6  | Acidified (untreated) | 37.78 $\pm$ 0.50 <sup>ab</sup> | 65.55 $\pm$ 0.57 <sup>a</sup> | 59.40 $\pm$ 0.59 <sup>a</sup> | 124.95 $\pm$ 1.13 <sup>a</sup>   | 114.14 $\pm$ 1.03 <sup>a*</sup> | 23.21 $\pm$ 0.16 <sup>e</sup>  | -22.53 $\pm$ 1.07 <sup>c*</sup> | -5.37 $\pm$ 1.04 <sup>d</sup>  | -13.72 $\pm$ 1.03 <sup>d*</sup> |
|      | 2                     | 38.44 $\pm$ 1.00 <sup>a</sup>  | 30.62 $\pm$ 8.50 <sup>c</sup> | 31.18 $\pm$ 5.34 <sup>b</sup> | 61.80 $\pm$ 13.73 <sup>c</sup>   | 62.76 $\pm$ 6.08 <sup>b*</sup>  | 38.84 $\pm$ 5.61 <sup>d</sup>  | 68.98 $\pm$ 9.57 <sup>b*</sup>  | 70.02 $\pm$ 6.67 <sup>c*</sup> | 69.52 $\pm$ 7.98 <sup>c*</sup>  |
|      | 4                     | 38.38 $\pm$ 1.03 <sup>ab</sup> | 25.64 $\pm$ 2.40 <sup>c</sup> | 26.86 $\pm$ 1.45 <sup>b</sup> | 52.49 $\pm$ 3.81 <sup>c</sup>    | 69.06 $\pm$ 5.79 <sup>b*</sup>  | 42.27 $\pm$ 1.32 <sup>d</sup>  | 71.54 $\pm$ 3.16 <sup>b*</sup>  | 71.70 $\pm$ 2.40 <sup>c*</sup> | 71.62 $\pm$ 2.73 <sup>c*</sup>  |
|      | 15                    | 32.85 $\pm$ 2.96 <sup>cd</sup> | 8.95 $\pm$ 0.55 <sup>d</sup>  | 11.26 $\pm$ 1.71 <sup>c</sup> | 20.21 $\pm$ 2.26 <sup>d</sup>    | 62.14 $\pm$ 5.45 <sup>b*</sup>  | 61.94 $\pm$ 1.65 <sup>c</sup>  | 89.54 $\pm$ 0.86 <sup>a*</sup>  | 87.50 $\pm$ 2.07 <sup>b*</sup> | 88.49 $\pm$ 1.50 <sup>b*</sup>  |

(Y<sub>a-La</sub>) = a-La yield. (Pur<sub>a-La</sub>) = a-La Purification degree. (Preb-LgA) = b-Lg A precipitation degree. (Preb-LgB) = b-Lg B precipitation degree.
