# Supplementary material for: Separation of α-Lactalbumin-Enriched Fractions from Caprine and Ovine Native Whey Concentrate by Combining Membrane and High-Pressure Processing
Source: MDPI journal article supplement (doi:10.3390/foods12142688), 2023-07-12
Supplement: s1 [file s1]

**Table S2.** Protein concentrations and main process performance parameters of  $\alpha$ -Lactalbumin ( $\alpha$ -La) enriched fraction after high-pressure processing (HPP) of caprine native whey concentrate (NWC) at 600 MPa at 23°C (supernatant). Each value is expressed as mean value  $\pm$  SD (n = 3). Different small letters in the same column indicate significant (P < 0.05) differences according to Tukey test. \*Significant differences regarding the control (untreated) NWC (T-Test).

| pH   | HPP processing (min)  | a-La concentration (mg/mL)    | b-Lg concentration (mg/mL)     | Y <sub>a-La</sub> (%)           | Pur <sub>a-La</sub> (%)        | Pre <sub>b-Lg</sub> (%)         |
|------|-----------------------|-------------------------------|--------------------------------|---------------------------------|--------------------------------|---------------------------------|
| P-pH | Control (untreated)   | 21.24 $\pm$ 1.65 <sup>b</sup> | 81.94 $\pm$ 4.84 <sup>b</sup>  | -                               | 20.57 $\pm$ 0.30 <sup>e</sup>  | -                               |
|      | 2                     | 27.93 $\pm$ 0.53 <sup>a</sup> | 6.91 $\pm$ 0.89 <sup>de</sup>  | 75.61 $\pm$ 4.12 <sup>cd*</sup> | 80.21 $\pm$ 2.08 <sup>b</sup>  | 95.16 $\pm$ 0.70 <sup>a*</sup>  |
|      | 4                     | 25.49 $\pm$ 0.42 <sup>a</sup> | 3.02 $\pm$ 0.69 <sup>e</sup>   | 64.52 $\pm$ 5.68 <sup>de*</sup> | 89.45 $\pm$ 2.06 <sup>a</sup>  | 97.99 $\pm$ 0.63 <sup>a*</sup>  |
|      | 15                    | 17.87 $\pm$ 3.18 <sup>b</sup> | 1.39 $\pm$ 0.01 <sup>e</sup>   | 30.22 $\pm$ 7.73 <sup>f*</sup>  | 96.85 $\pm$ 0.62 <sup>a</sup>  | 99.39 $\pm$ 0.08 <sup>a*</sup>  |
| 4.6  | Acidified (untreated) | 26.79 $\pm$ 0.12 <sup>a</sup> | 103.61 $\pm$ 1.03 <sup>a</sup> | 129.86 $\pm$ 0.56 <sup>a*</sup> | 20.54 $\pm$ 0.14 <sup>e</sup>  | -30.16 $\pm$ 1.30 <sup>d*</sup> |
|      | 2                     | 25.86 $\pm$ 1.10 <sup>a</sup> | 80.11 $\pm$ 3.59 <sup>b</sup>  | 94.70 $\pm$ 7.05 <sup>b</sup>   | 24.41 $\pm$ 0.65 <sup>de</sup> | 23.82 $\pm$ 8.10 <sup>c*</sup>  |
|      | 4                     | 26.96 $\pm$ 1.04 <sup>a</sup> | 62.42 $\pm$ 11.61 <sup>c</sup> | 84.62 $\pm$ 3.98 <sup>bc</sup>  | 30.49 $\pm$ 3.44 <sup>d</sup>  | 49.23 $\pm$ 9.54 <sup>b*</sup>  |
|      | 15                    | 25.56 $\pm$ 0.97 <sup>a</sup> | 17.86 $\pm$ 3.01 <sup>d</sup>  | 56.22 $\pm$ 10.87 <sup>e*</sup> | 59.06 $\pm$ 3.89 <sup>c</sup>  | 89.93 $\pm$ 1.88 <sup>a*</sup>  |

(Y<sub>a-La</sub>) = a-La yield. (Pur<sub>a-La</sub>) = a-La Purification degree. (Pre<sub>b-LgA</sub>) = b-Lg A precipitation degree. (Pre<sub>b-LgB</sub>) = b-Lg B precipitation degree.
