# Supplementary material for: Separation of α-Lactalbumin-Enriched Fractions from Caprine and Ovine Native Whey Concentrate by Combining Membrane and High-Pressure Processing
Source: MDPI journal article supplement (doi:10.3390/foods12142688), 2023-07-12
Supplement: s1 [file s1]

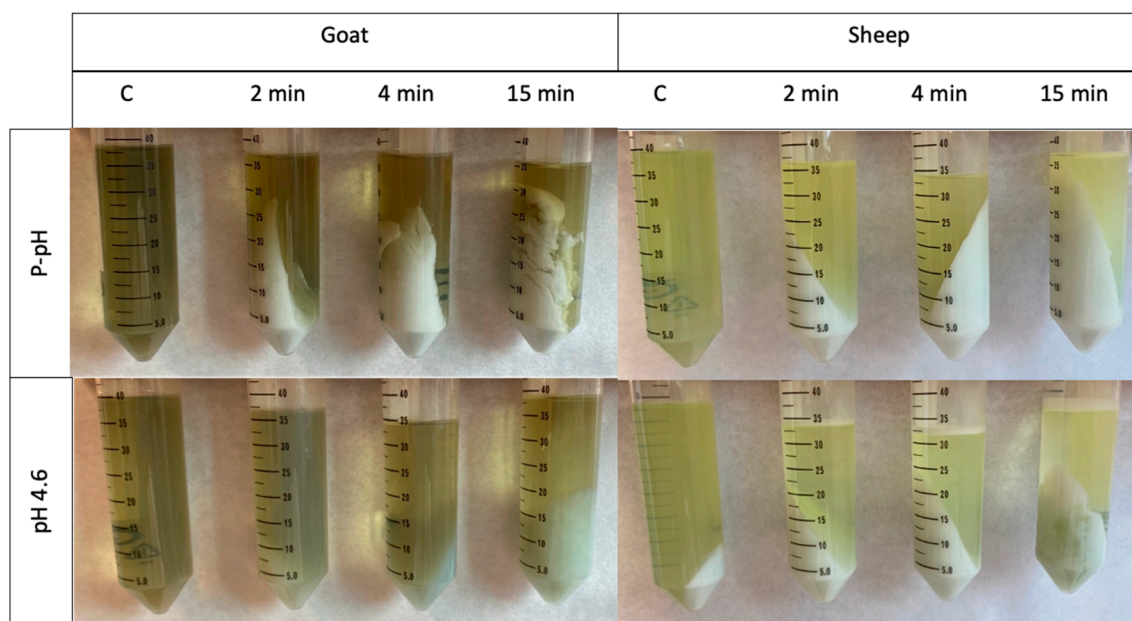

**Figure S1.** Visual appearance of caprine (left) and ovine (right) NWC<sub>sup</sub> after HPP (600 MPa, 23 °C) at physiological (P-pH) and 4.6 pH for 0 (control) 2, 4 and 15 min.
